# Supplementary material
Source: publisher figshare collection journal article supplement (https://acs.figshare.com/ndownloader/files/3992467)
Supplement: Supplementary file 1 [file 3992467]

## **Supporting Information**

### **Highly Uniform Hollow GdF<sub>3</sub> Spheres: Controllable Synthesis, Tuned Luminescence and Drug Release Properties**

Ruichan Lv, Shili Gai,\* Yunlu Dai, Na Niu, Fei He, and Piaoping Yang\*

Key Laboratory of Superlight Materials and Surface Technology, Ministry of Education, Harbin

Engineering University, Harbin 150001, P. R. China

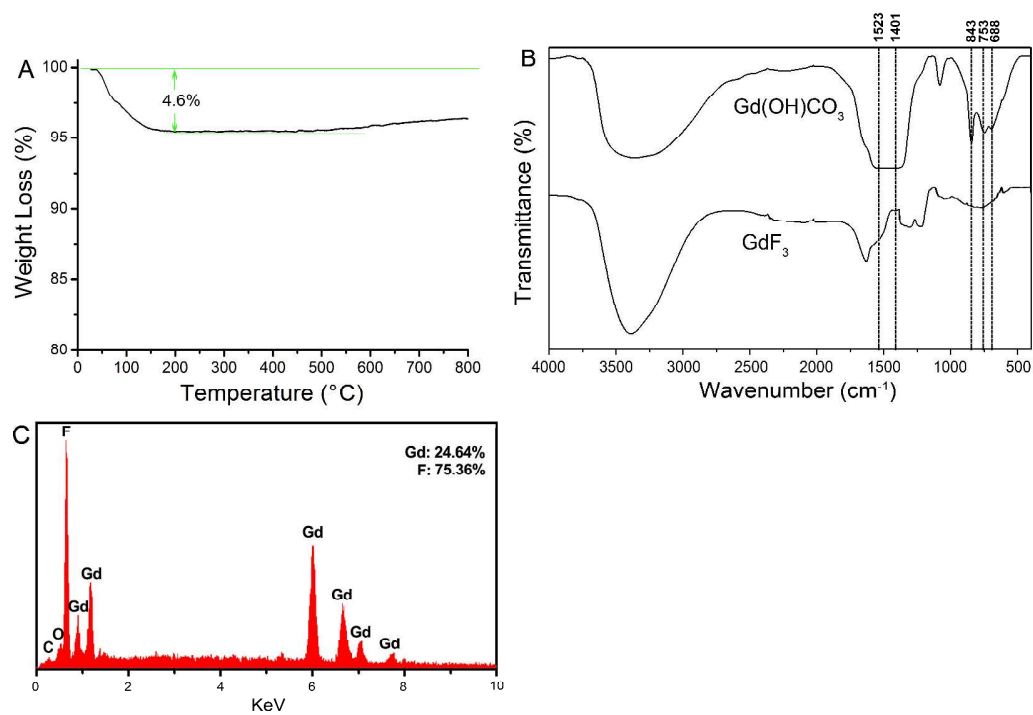

**Figure S1.** TG curve (A), FT-IR (B) and EDS (C) of the GdF<sub>3</sub> hollow spheres.

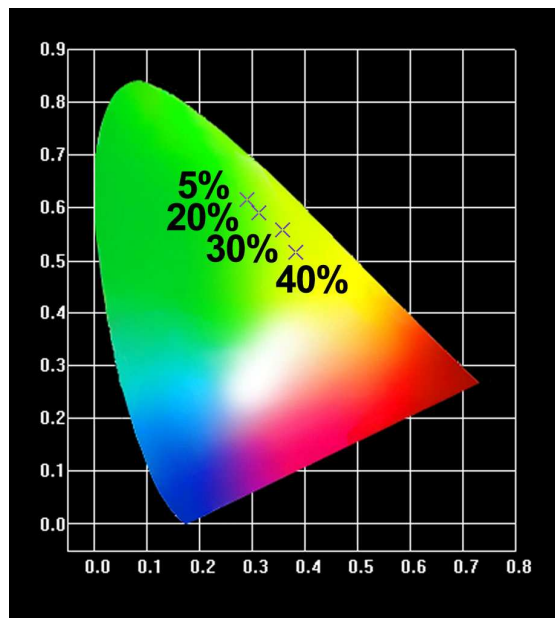

**Figure S2.** CIE chromaticity diagram of  $\text{GdF}_3\text{:}x\%\text{Yb}^{3+}, 1\text{Er}^{3+}$  ( $x = 5, 20, 30$  and  $40$ ).

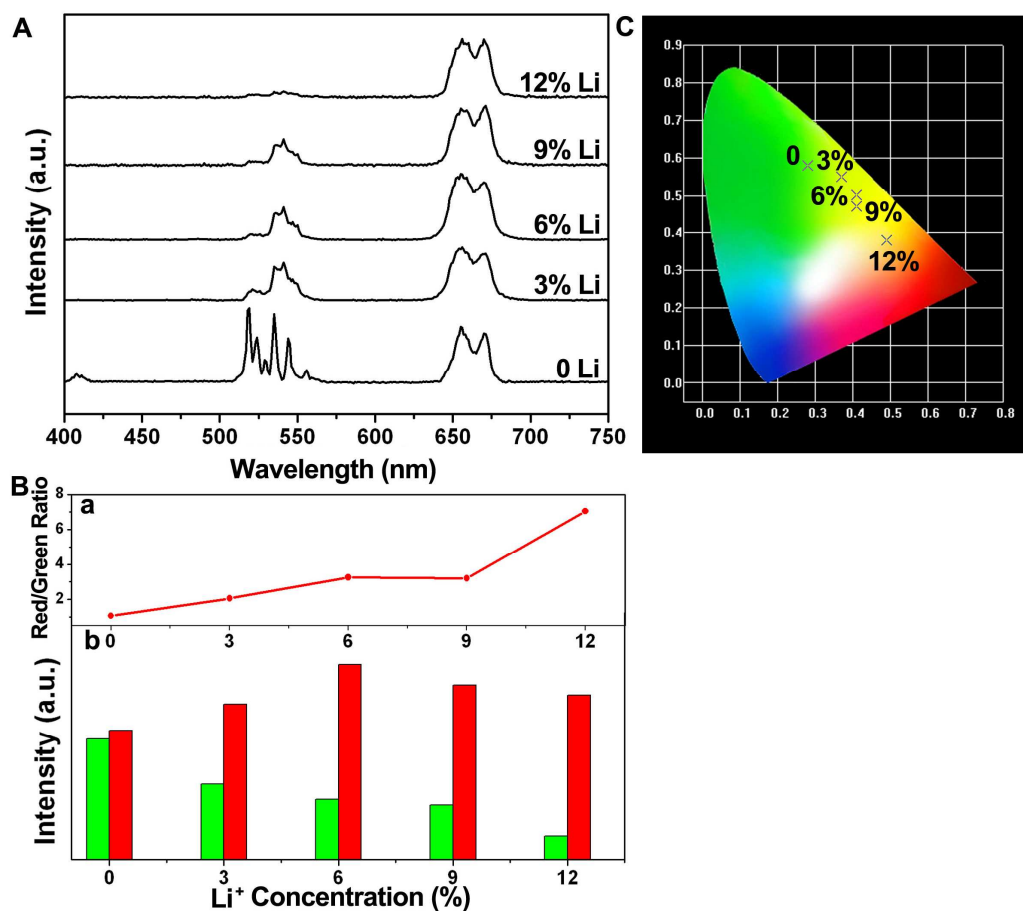

**Figure S3.** UC luminescence spectra of  $\text{GdF}_3:15\%\text{Yb}^{3+}, 1\%\text{Er}^{3+}, y\%\text{Li}^+$  (y = 0, 3, 6, 9 and 12) under 980 nm excitation (A); the red/green ratio (a) and integral intensity (b) of the green and red colors with different  $\text{Yb}^{3+}$ -doped concentration (B). CIE chromaticity diagram of  $\text{GdF}_3:15\%\text{Yb}^{3+}, 1\%\text{Er}^{3+}, y\%\text{Li}^+$  (y = 0, 3, 6, 9 and 12) under 980 nm excitation (C).

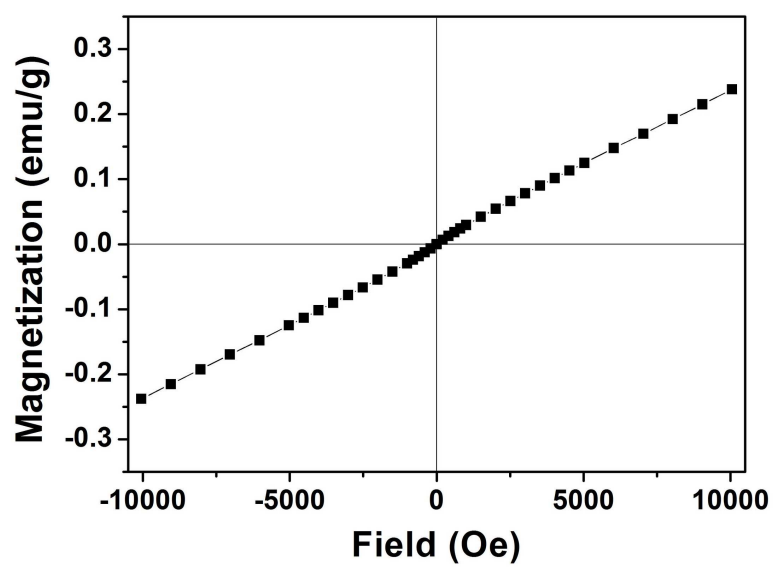

**Figure S4.** Magnetization as a function of the applied field for GdF<sub>3</sub> hollow spheres.

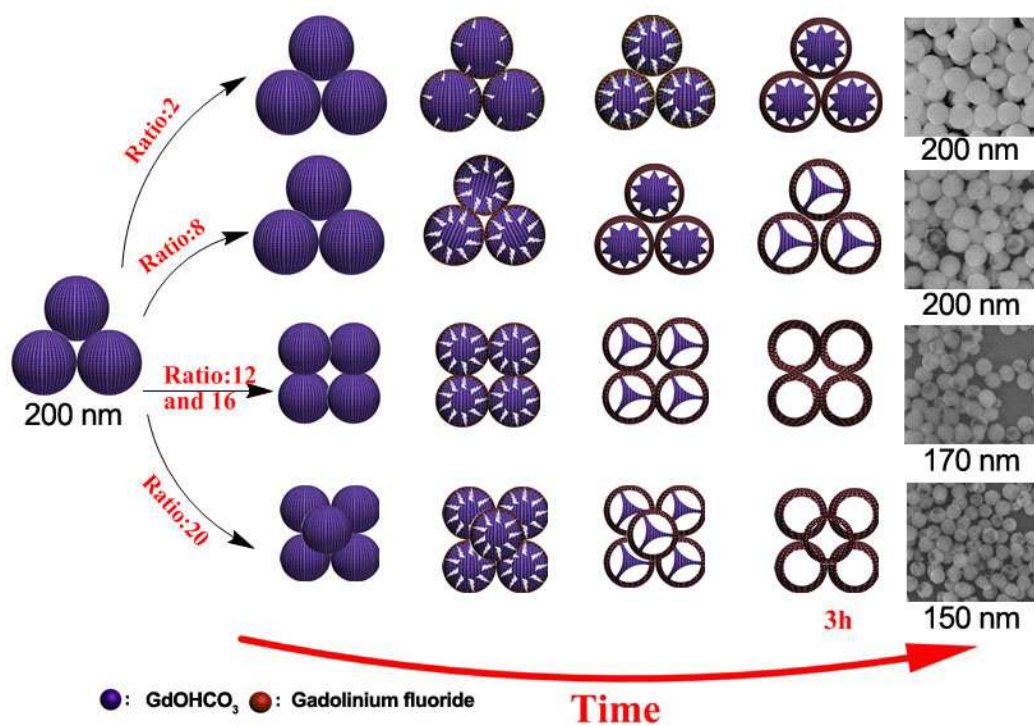

**Scheme S1.** Illustration of phase and morphology for gadolinium fluorides with altered  $\text{NaBF}_4/\text{Gd}^{3+}$  molar ratios.
